# Supplementary material for: Dispersal and Oviposition Patterns of Lycorma Delicatula (Hemiptera: Fulgoridae) During Oviposition Period in Ailanthus Altissima (Simaroubaceae)
Source: Research Square preprint supplement (doi:10.21203/rs.3.rs-1201537/v1), 2022-01-05
Supplement: Supplementary file 1 [file d8ee9b8b84795fceb65e726b.docx]

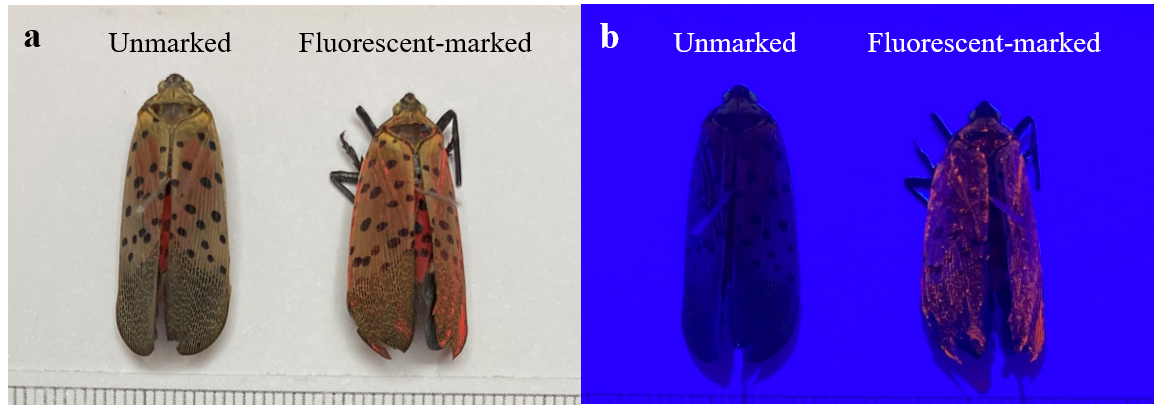


Supplementary information SI 1. Unmarked and fluorescent-marked *Lycorma delicatula* adults under **a** white light and **b** ultraviolet (UV) light illuminated in the dark.


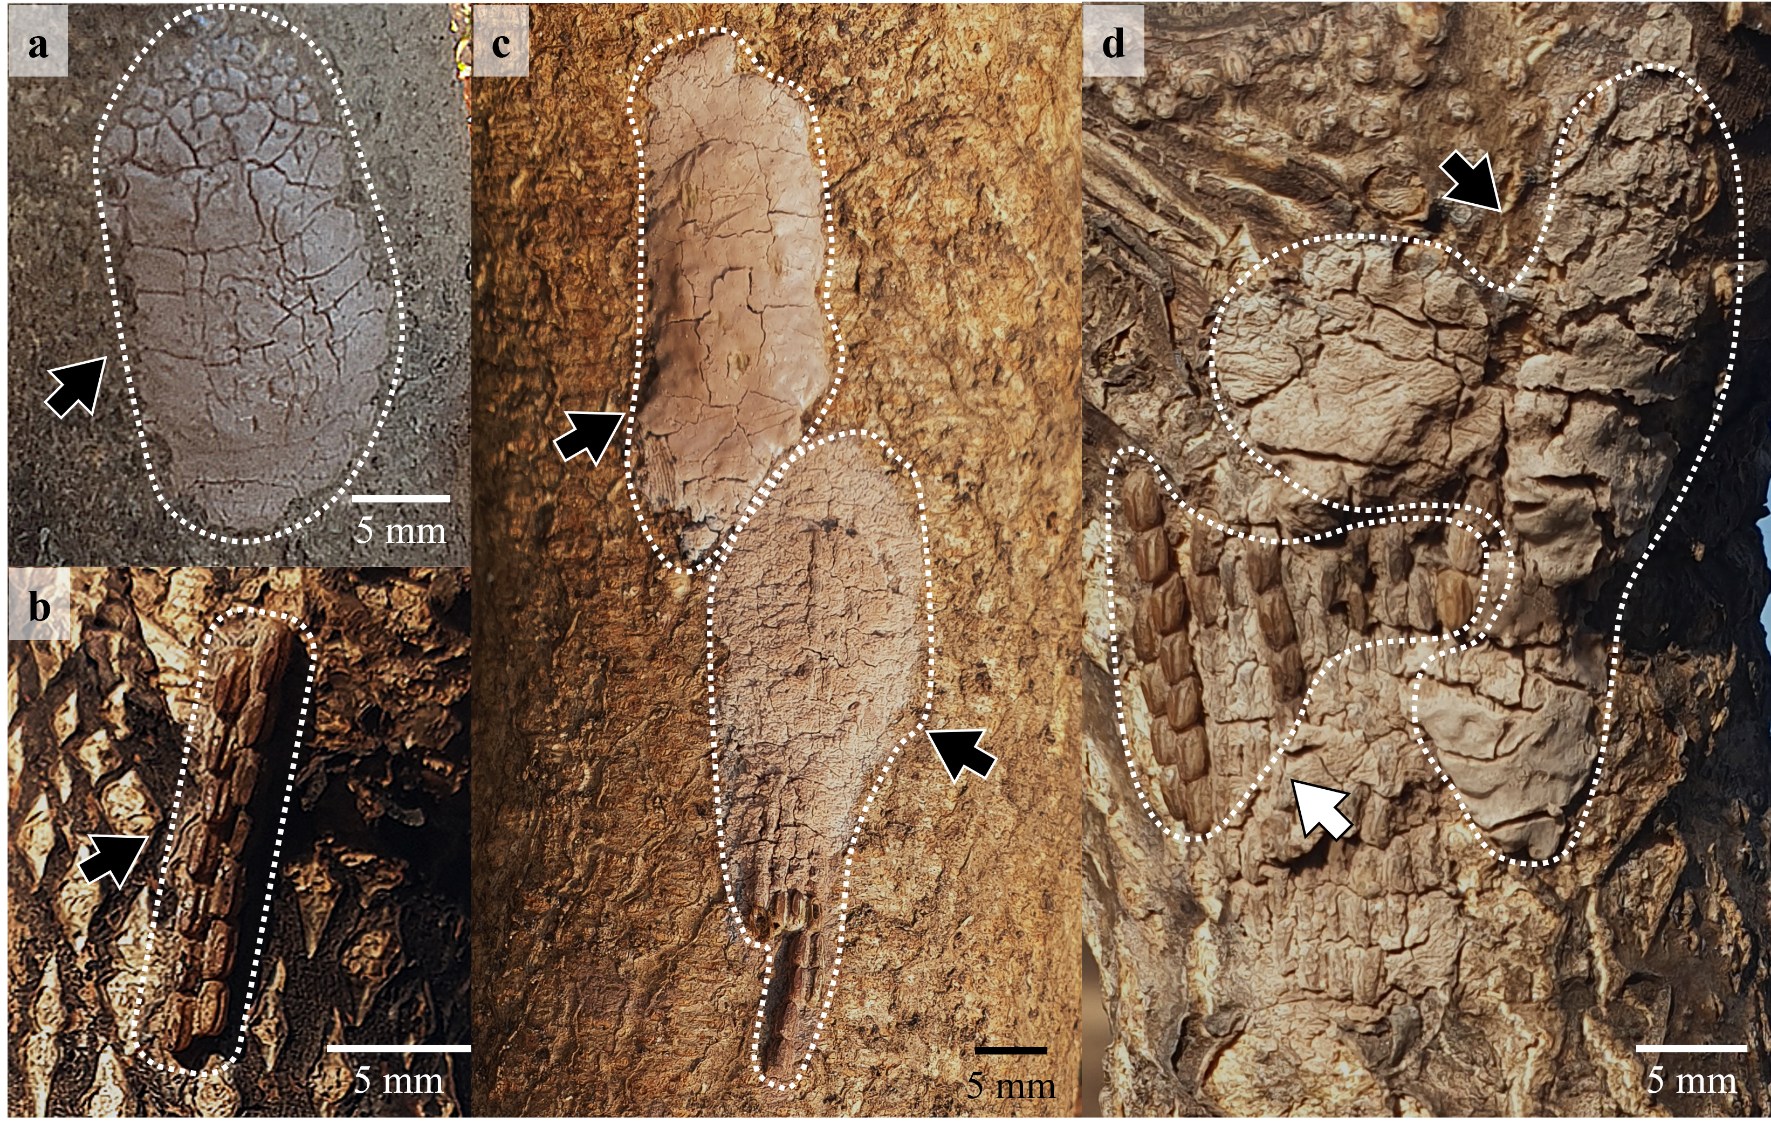


SI 2.Different types of egg masses or eggs of *Lycorma delicatula* found on *Ailanthus altissima* trees. **a** Egg mass with waxy layer. **b** Egg mass without waxy layer. **c** Two separate egg masses covered with waxy layer. **d** A single egg mass covered with waxy layer and adjacent scattered eggs. Black arrows indicate egg masses with or without waxy layers, and the white arrow indicates scattered eggs.
